# Supplementary material for: Ozone Exposure Controls Oxidative Stress and the Inflammatory Process of Hepatocytes in Murine Models
Source: MDPI journal article supplement (doi:10.3390/antiox13020212), 2024-02-08
Supplement: s1 [file s1]

Supplementary materials

**Table S1.** Complete search strategy with search filters and the number of studies retrieved from databases **PubMed-Medline e Scopus**.

**Table S1- Research Question Components following the PICO Strategy**

| Abbreviations | Parameters (description) | Question Components                |
|---------------|--------------------------|------------------------------------|
| P             | Population               | Murine models                      |
| I             | Intervention             | Ozone therapy                      |
| C             | Comparison               | Animals that did not receive ozone |
| O             | Outcomes                 | Oxidative stress in liver tissue   |

**Table S2- Full search strategy in PubMed and Scopus, including search terms and filters.**

| Data base                                                | Descriptors                                                                                                                                                                                                                | Items Found | Time       | Date  |
|----------------------------------------------------------|----------------------------------------------------------------------------------------------------------------------------------------------------------------------------------------------------------------------------|-------------|------------|-------|
| P<br>u<br>b<br>M<br>e<br>d                               | #1 Ozone Filter<br>("ozone"[MeSH Terms] OR Ozone therapy [TIAB])                                                                                                                                                           | 15,779      | 07/04/2021 | 17:23 |
|                                                          | #2 Therapeutics Filter<br>("therapeutics"[MeSH Terms] OR therapy[TIAB] OR "therapeutic use"[Subheading] OR "therapeutic uses"[MeSH Terms] OR therapeutic use[TIAB])                                                        | 8,934,939   | 07/04/2021 | 17:23 |
|                                                          | #3 Antioxidant filter<br>("antioxidants"[MeSH Terms] OR "antioxidants"[Title/Abstract] OR "oxidative stresses"[Title/Abstract] OR "antioxidative stress"[Title/Abstract] OR "oxidative stress injury"[Title/Abstract])     | 172,003     | 07/04/2021 | 17:24 |
|                                                          | <b>Total: #1 AND #2 AND #3</b>                                                                                                                                                                                             | 221         | 07/04/2021 | 17:25 |
| Data base                                                |                                                                                                                                                                                                                            | Items Found | Time       | Date  |
| S<br>c<br>o<br>p<br>u<br>s                               | #1 Ozone Filter<br>(TITLE-ABS-KEY ("ozone") OR TITLE-ABS-KEY ("Ozone therapy"))                                                                                                                                            | 112,509     | 07/04/2021 | 17:33 |
|                                                          | #2 Therapeutics Filter<br>(TITLE-ABS-KEY ("therapeutics") OR TITLE-ABS-KEY ("therapy") OR TITLE-ABS-KEY ("therapeutic use"))                                                                                               | 4,851,800   | 07/04/2021 | 17:33 |
|                                                          | #3 Antioxidant filter<br>(TITLE-ABS-KEY ("antioxidants") OR TITLE-ABS-KEY ("antioxidants") OR TITLE-ABS-KEY ("oxidative stresses") OR TITLE-ABS-KEY ("antioxidative stress") OR TITLE-ABS-KEY ("oxidative stress injury")) | 650,154     | 07/04/2021 | 17:34 |
|                                                          | <b>Total: #1 AND #2 AND #3</b>                                                                                                                                                                                             | 379         | 07/04/2021 | 17:34 |
| Data base                                                |                                                                                                                                                                                                                            | Items Found | Time       | Date  |
| W<br>E<br>B<br>O<br>F<br>S<br>C<br>I<br>E<br>N<br>C<br>E | #1 Ozone Filter<br>TS=ozone OR TS=Ozone therapy                                                                                                                                                                            | 96.550      | 07/04/2021 | 17:33 |
|                                                          | #2 Therapeutics Filter<br>TS=therapeutics OR TS=therapy OR TS=therapeutic use OR TS=therapeutic uses OR TS=therapeutic use                                                                                                 | 2.852.755   | 07/04/2021 | 17:33 |
|                                                          | #3 Antioxidant filter<br>TS=antioxidants OR TS=antioxidants OR TS=oxidative stresses OR TS=antioxidative stress OR TS=oxidative stress injury                                                                              | 661.260     | 07/04/2021 | 17:33 |
|                                                          | <b>Total: #1 and #2 and #3</b>                                                                                                                                                                                             | 332         | 07/04/2021 | 17:33 |

**Table S3 - Animal model Characteristics**

| <b>Animal Model: Rat</b>           | <b>Country</b> | <b>Strain</b>   | <b>Sex</b> | <b>Age (months)</b> | <b>Weith (g)</b> | <b>Total number</b> |
|------------------------------------|----------------|-----------------|------------|---------------------|------------------|---------------------|
| Laszcycza , et al.1996             | Poland         | Wistar          | M          | ?                   | 266 -299         | ?                   |
| León, et al. 1998                  | Cuba           | Sprague -Dawley | F          | ?                   | 220–250          | 60                  |
| Peralta, et al. 1999               | Spain          | Wistar          | M          | ?                   | 250 - 300        | 18                  |
| Peralta <sup>a</sup> , et al. 2000 | Spain          | Wistar          | M          | ?                   | 250 -300         | 56                  |
| Jalil, et al. 2001                 | Cuba           | Sprague-Dawley  | F          | ?                   | 200–250          | 40                  |
| Ajamieh, et al. 2002               | Cuba           | Wistar          | M          | ?                   | 250–300          | 32                  |
| Ajamieh, et al. 2004               | Cuba           | Wistar          | M          | ?                   | 250–275          | 50                  |
| Ajamieh, et al. 2005               | Cuba           | Wistar          | M          | ?                   | 250–275          | 60                  |
| Madje, et al. 2007                 | Poland         | Wistar          | M          | 4                   | 164 -180         | 60                  |
| Guanche, et al. 2010               | Cuba           | Wistar          | M          | ?                   | ?                | 60                  |
| Gul, et al. 2012                   | Turkey         | Sprague-Dawley  | M          | ?                   | 200–250          | 27                  |
| Gultekin, et al. 2012              | Turkey         | Wistar          | F          | ?                   | 200–230          | 30                  |
| Safwat, et al. 2014                | Egypt          | Wistar          | M          | 3                   | 180- 220         | 60                  |
| Aslaner, et al. 2015               | Turkey         | Wistar          | M          | ?                   | 250-300          | 18                  |
| Erdemli, et al. 2018               | Turkey         | Wistar          | M          | 3 - 4               | 200-250          | 36                  |
| Adali, et al. 2019                 | Turkey         | Wistar          | F          | 4 - 6               | 190-250          | 48                  |
| Guvendi, et al. 2020               | Turkey         | Wistar          | F          | 4-6                 | 190-250          | 48                  |
| <b>Animal Model: Mice</b>          | <b>Country</b> | <b>Strain</b>   | <b>Sex</b> | <b>Age</b>          | <b>Weith</b>     | <b>Total number</b> |
| Reference                          |                |                 |            |                     |                  |                     |
| Zamora, et al. 2005                | Cuba           | Balb /c mice    | M          | ?                   | 18-20            | 35                  |
| Rodriguez, et al. 2011             | Cuba           | Balb/c mice     | M          | ?                   | 18–20            | 50                  |

**Table S4- Intervention characteristics ozone therapy and liver injury**

| Reference              | Control               | Liver injury            | Applied dose (mg/kg) | Ozone concentration (µg/mL) | Route               | Frequency                                                                              | Duration (Day) |
|------------------------|-----------------------|-------------------------|----------------------|-----------------------------|---------------------|----------------------------------------------------------------------------------------|----------------|
| Laszczyca et al., 1996 | Cadmium               | Cadmium                 | 0.14 **              | 40                          | Intraperitoneal     | Once a day                                                                             | 10             |
| León et al., 1998      | CCl <sub>4</sub>      | CCl <sub>4</sub>        | 1                    | 50                          | Intraperitoneal     | Once a day                                                                             | 15             |
| Peralta et al., 1999   | Ischemia-reperfusion  | Ischemia-reperfusion    | 1                    | 50                          | Rectal insufflation | Once a day                                                                             | 10             |
| Peralta et al., 2000   | Untreated             | hepatic ischemia        | 1                    | 50                          | Rectal insufflation | Once a day                                                                             | 10             |
| Jalil et al., 2001     | CCl <sub>4</sub>      | CCl <sub>4</sub>        | 1                    | 50                          | Rectal insufflation | Once a day                                                                             | 15             |
| Ajamieh et al., 2002   | ischaemia/reperfusion | hepatic ischemia        | 1                    | 50                          | Rectal insufflation | Once a day                                                                             | 15             |
| Ajamieh et al., 2004   | ischaemia/reperfusion | ischaemia/reperfusion   | 1                    | 50                          | Rectal insufflation | Once a day                                                                             | 15             |
| Ajamieh et al., 2005   | ischemia/reperfusion  | hepatic ischemia        | 1                    | 50                          | Rectal insufflation | Once a day                                                                             | 15             |
| Zamora et al., 2005    | LPS                   | LPS                     | 0.2; 0.4; 1.2        | 3,8; 7,6; 22,8 **           | Intraperitoneal     | Once a day                                                                             | 5              |
| Madej et al., 2007     | LPS                   | LPS                     | 0.15                 | 54                          | Intraperitoneal     | Once a day                                                                             | 10             |
| Guanche et al., 2010   | Sepsis                | Sepsis (fecal material) | ?                    | 10, 30; 50                  | Intraperitoneal     | Once a day                                                                             | 5              |
| Rodríguez et al., 2011 | LPS                   | LPS                     | 0.2; 0.4; 1.2        | 3,8; 7,6; 22,8 **           | Intraperitoneal     | Once a day                                                                             | 5              |
| Gul et al., 2012       | acetaminophen         | acetaminophen           | 0.7                  | 60                          | Intraperitoneal     | Once time                                                                              | 1              |
| Gultekin et al., 2012  | Saline solution       | ionizing radiation      | 0.7                  | 60 ***                      | Intraperitoneal     | Once a day                                                                             | 5              |
| Safwat et al., 2014    | Untreated             | ageing                  | 0.6                  | 67 **                       | Rectal insufflation | 1) twice weekly/90 days<br>once per week/ 450 days<br>2) three times weekly / 120 days | 450            |
| Aslaner et al., 2015   | Methotrexate          | Methotrexate            | 0.45 **              | 25                          | Intraperitoneal     | every day                                                                              | 15             |
| Erdemli et al., 2018   | Mandibular defect     | mandibular defect       | 0.6                  | 17                          | Rectal insufflation | Once a day                                                                             | 15             |
| Adali et al., 2019     | Alcoholic             | ethyl alcohol           | 0.5                  | ?                           | Intraperitoneal     | every day                                                                              | 7              |
| Guvendi et al., 2020   | Iron overload         | iron dextran            | 0.5                  | ?                           | Intraperitoneal     | Six days a week                                                                        | 27             |

\* Not informed in the text; \*\* Calculated (Considered average weight); \*\*\* 60 mg/mL (change to microgram would be 60000 µg); LPS lipopolysaccharide

**Table S5: Frequency and duration of days of ozone treatments**

| Days | Frequency | Percentage (%) |
|------|-----------|----------------|
| 1    | 1         | 5,26           |
| 5    | 4         | 21,05          |
| 7    | 1         | 5,26           |
| 10   | 4         | 21,05          |
| 15   | 6         | 31,58          |
| 20   | 1         | 5,26           |
| 27   | 1         | 5,26           |
| 450  | 1         | 5,26           |
